# Supplementary material for: Adsorption of Favipiravir on pristine graphene nanosheets as a drug delivery system: a DFT study
Source: Royal Society of Chemistry journal article supplement (doi:10.1039/d3ra03227b), 2023-01-01
Supplement: d3ra03227b1.pdf [file d3ra03227b1.pdf]

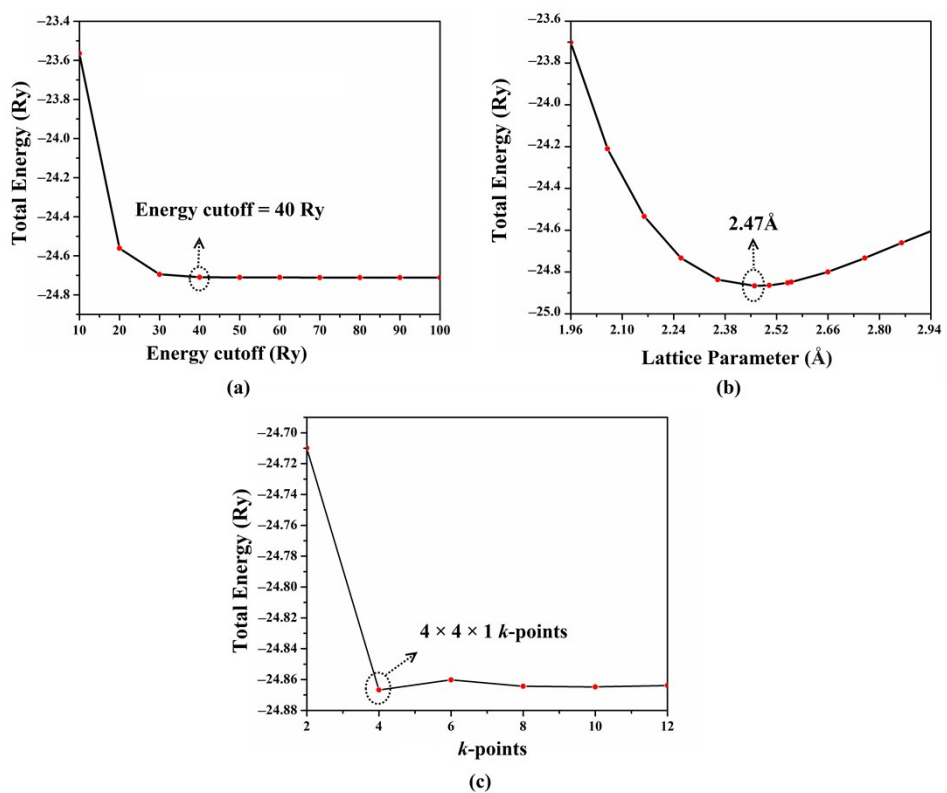

**Figure S1.** Convergence tests plots of the total energy with the (a) cutoff energy, (b) lattice parameter, and (c)  $k$ -point of the unit cell of GN with two C-atoms.

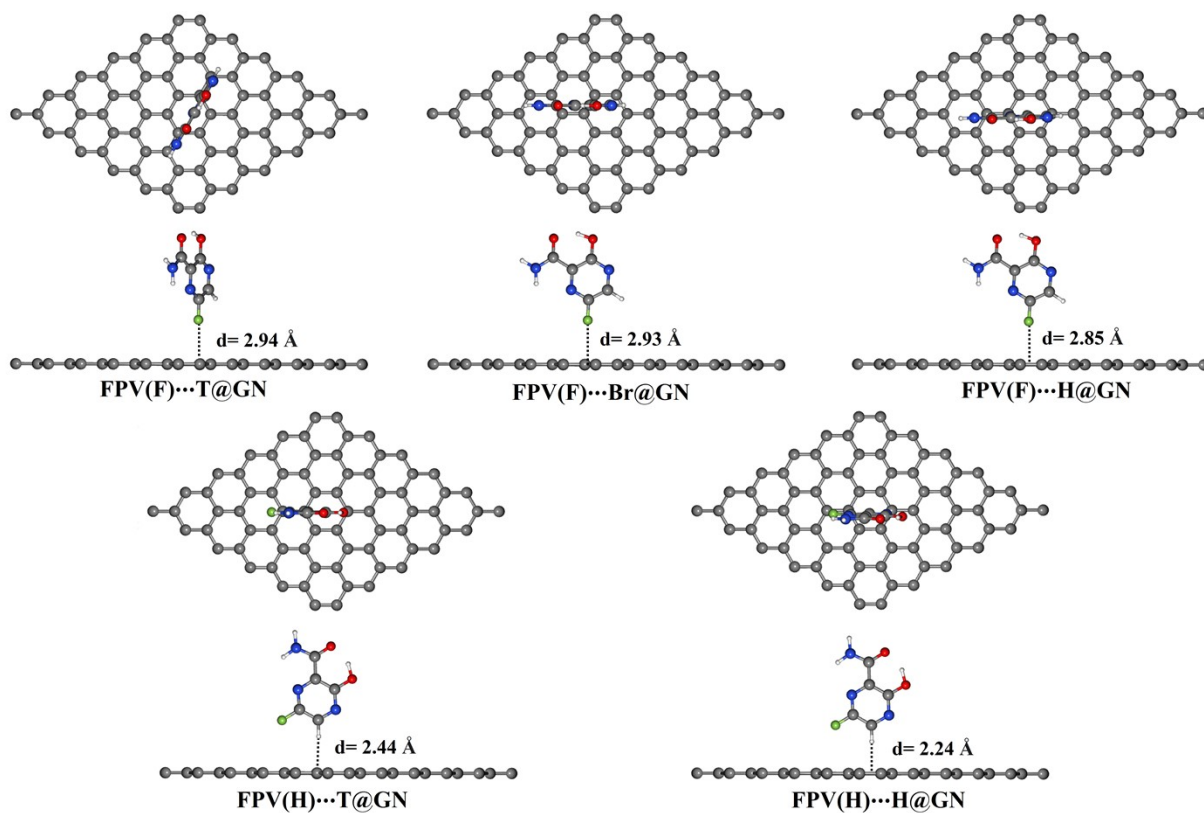

**Figure S2.** Relaxed structures of all FPV...GN complexes in perpendicular and parallel configurations with top and side views. The distance (d) between FPV drug and GN sheet are provided in Å.

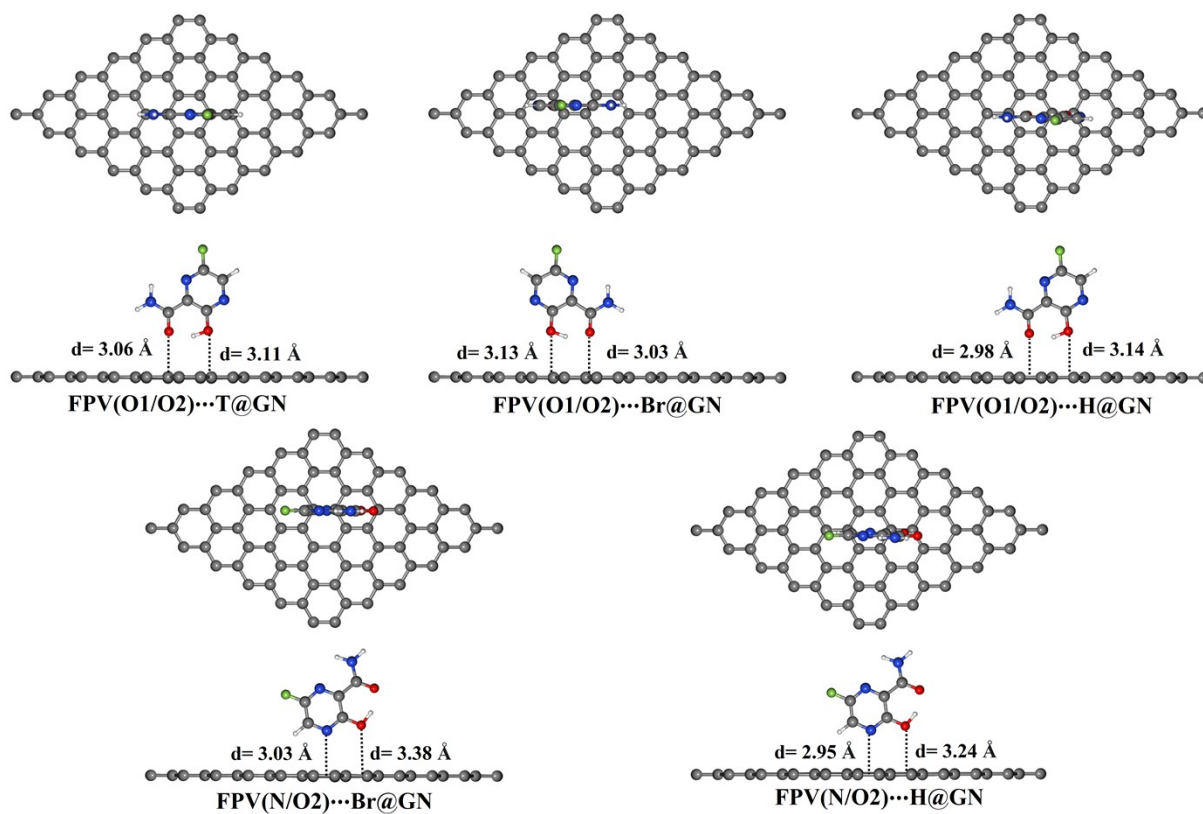

Figure S2. Continue.

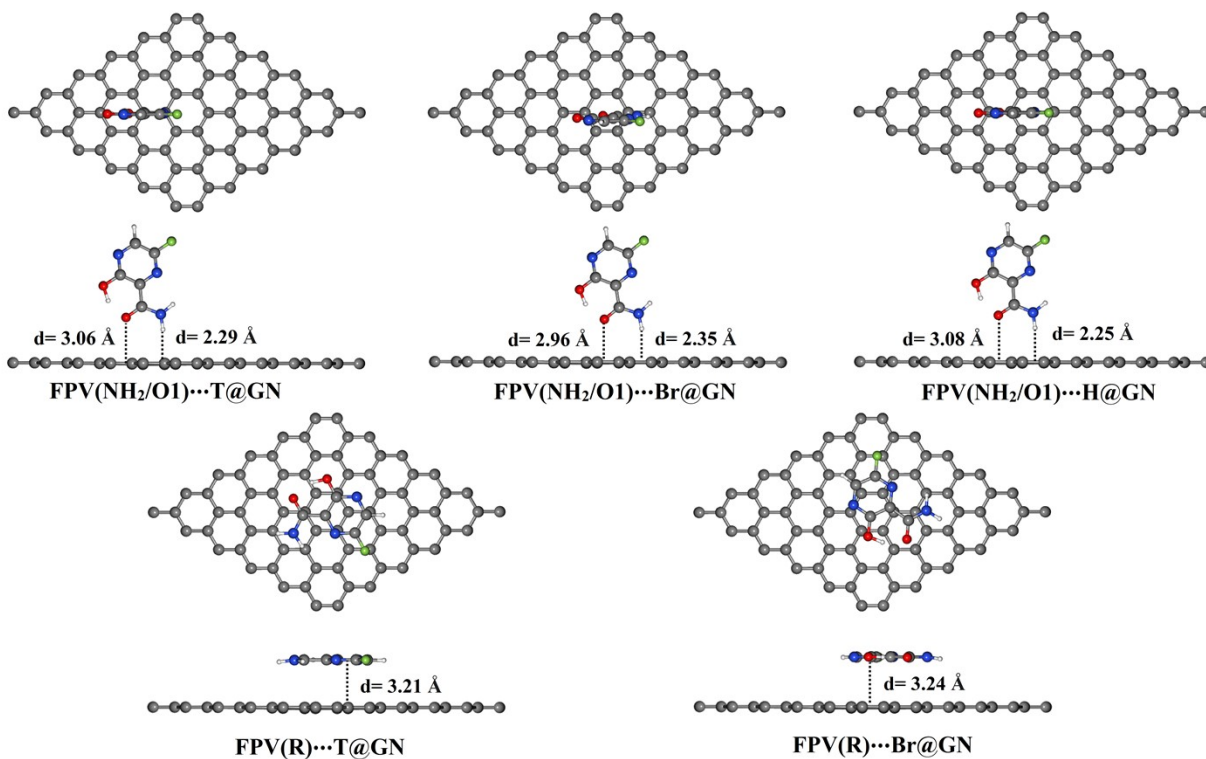

Figure S2. Continue.
